# Supplementary material for: Carbon based Y-type molecules for application in nonlinear optics
Source: Royal Society of Chemistry journal article supplement (doi:10.1039/c9tc06023e), 2019-12-12
Supplement: c9tc06023e1.pdf [file c9tc06023e1.pdf]

## Supporting Information

### Carbon based Y-type molecules for application in nonlinear optics

Cui-Cui Yang,<sup>a</sup> Yuan-Yuan He,<sup>a</sup> Xue-Lian Zheng,<sup>a</sup> Jiu Chen,<sup>a</sup> Ling Yang<sup>\*b</sup>, Wei-Qi Li<sup>\*c</sup>, Wei Quan Tian<sup>\*a</sup>

<sup>a</sup> Chongqing Key Laboratory of Theoretical and Computational Chemistry, College of Chemistry and Chemical Engineering, Chongqing University, Huxi Campus, Chongqing, 401331, P. R. China

<sup>b</sup>MIIT Key Laboratory of Critical Materials Technology for New Energy Conversion and Storage, Institute of Theoretical and Simulational Chemistry, School of Chemistry and Chemical Engineering, Harbin Institute of Technology, Harbin 150080 P. R. China

<sup>c</sup>Department of Physics, Harbin Institute of Technology, Harbin 150001 P. R. China

\*Corresponding author: yangling@hit.edu.cn, tccliweiqi@hit.edu.cn, tianwq@cqu.edu.cn

#### Supporting Information list:

**Figure S1.** Evolution of the static first hyperpolarizability ( $\langle\beta_0\rangle$ ) with electron excitation in Y-B type molecules with methyl group or isobutyl group at one azulene end in Y-B-C<sub>3h</sub>-3.

**Figure S2.** Evolution of the static first hyperpolarizability ( $\langle\beta_0\rangle$ ) with electron excitation in Y-B type molecules with F or NO<sub>2</sub> group at one azulene end in Y-B-C<sub>3h</sub>-3.

**Figure S3.** Evolution of the static first hyperpolarizability ( $\langle\beta_0\rangle$ ) with electron excitation in Y-B type molecules with naphthalene ends without (D<sub>3h</sub>) and with CN group (C<sub>s</sub>) at one naphthalene.

**Figure S4.** Evolution of the static first hyperpolarizability ( $\langle\beta_0\rangle$ ) with electron excitation in Y-Cs molecules.

**Figure S5.** Two-dimensional second order NLO spectra of azulene scanned from -7.00 eV to 7.00 eV with step size of 0.05 eV.

**Figure S6.** Two-dimensional second order NLO spectra of azulene with step size of 0.005 eV[(a)  $\omega_1$  scanned from 4.48 eV to 5.48 eV and  $\omega_2$  scanned from -5.48 eV to -4.48 eV; (b)  $\omega_1$  scanned from -0.5 eV to 0.5 eV and  $\omega_2$  scanned from -5.48 eV to -4.48 eV].

**Figure S7.** Two-dimensional second order NLO spectra of Y-B-NC-C<sub>2</sub>-3 scanned from -7.00 eV to 7.00 eV with step size of 0.05 eV.

**Table S1.** Major electronic spectra absorption peaks with transition nature in all molecules.

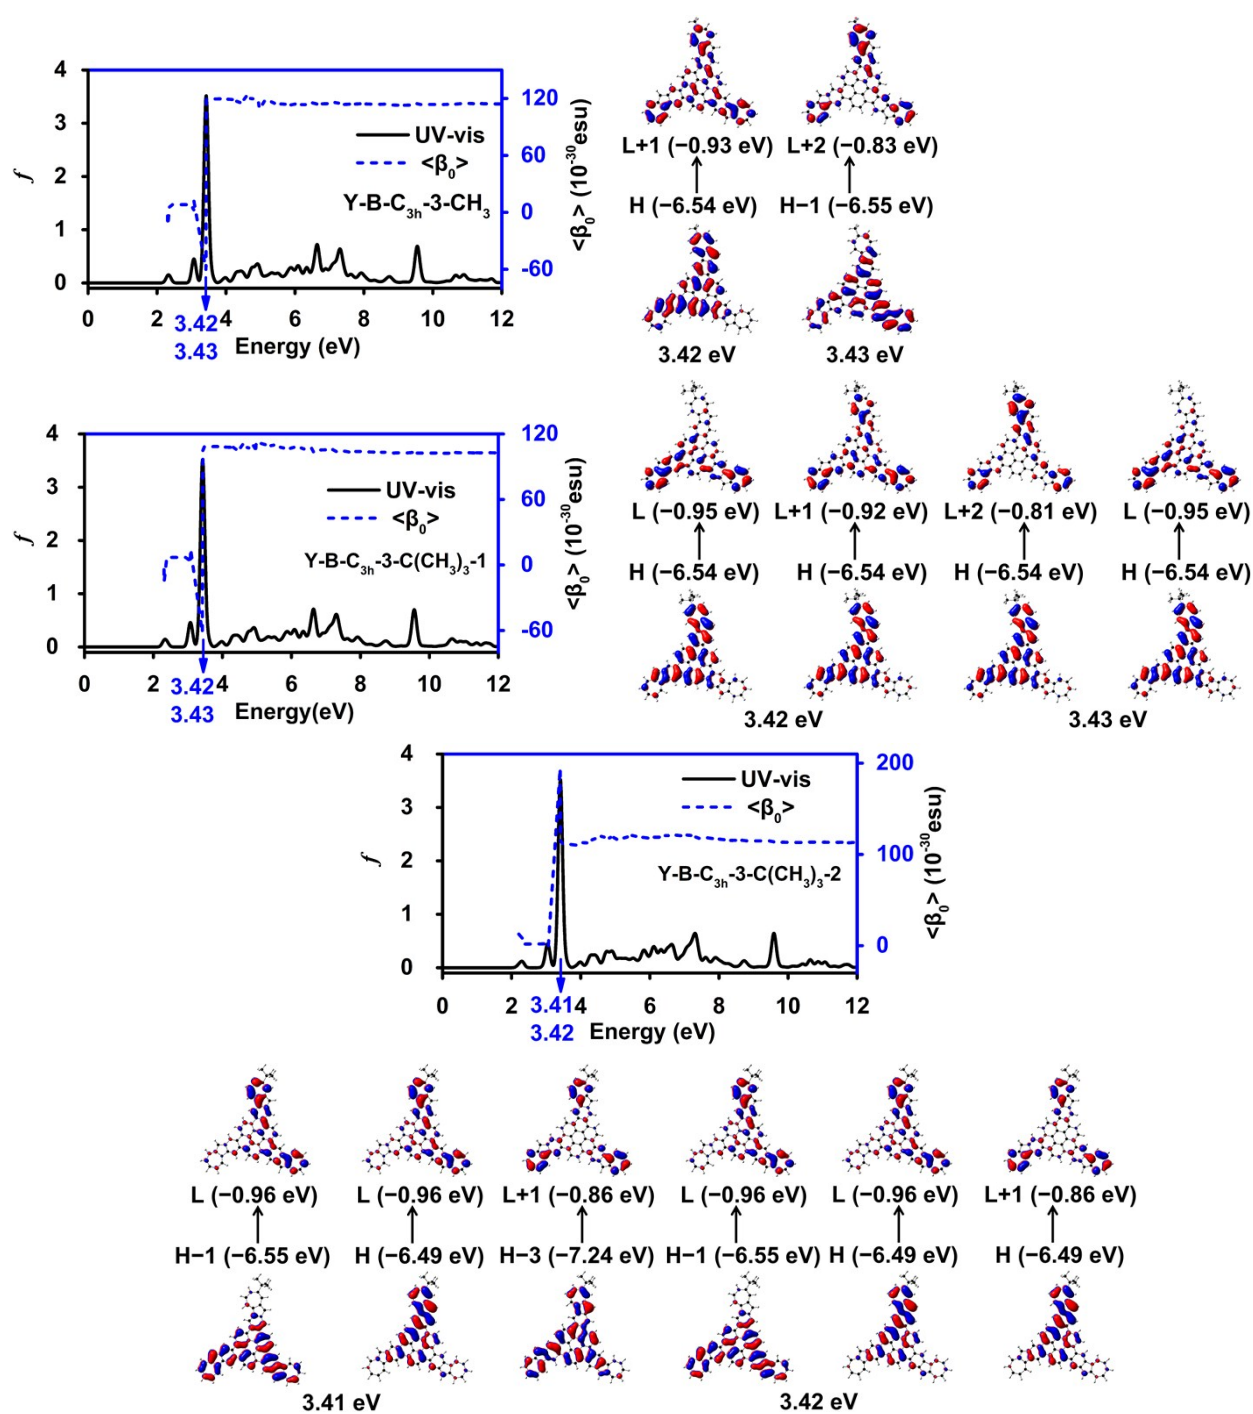

**Figure S1.** Evolution of the static first hyperpolarizability ( $\langle\beta_0\rangle$ ) with electron excitation in Y-B type molecules with methyl group or isobutyl group at one azulene end in Y-B-C<sub>3h</sub>-3.

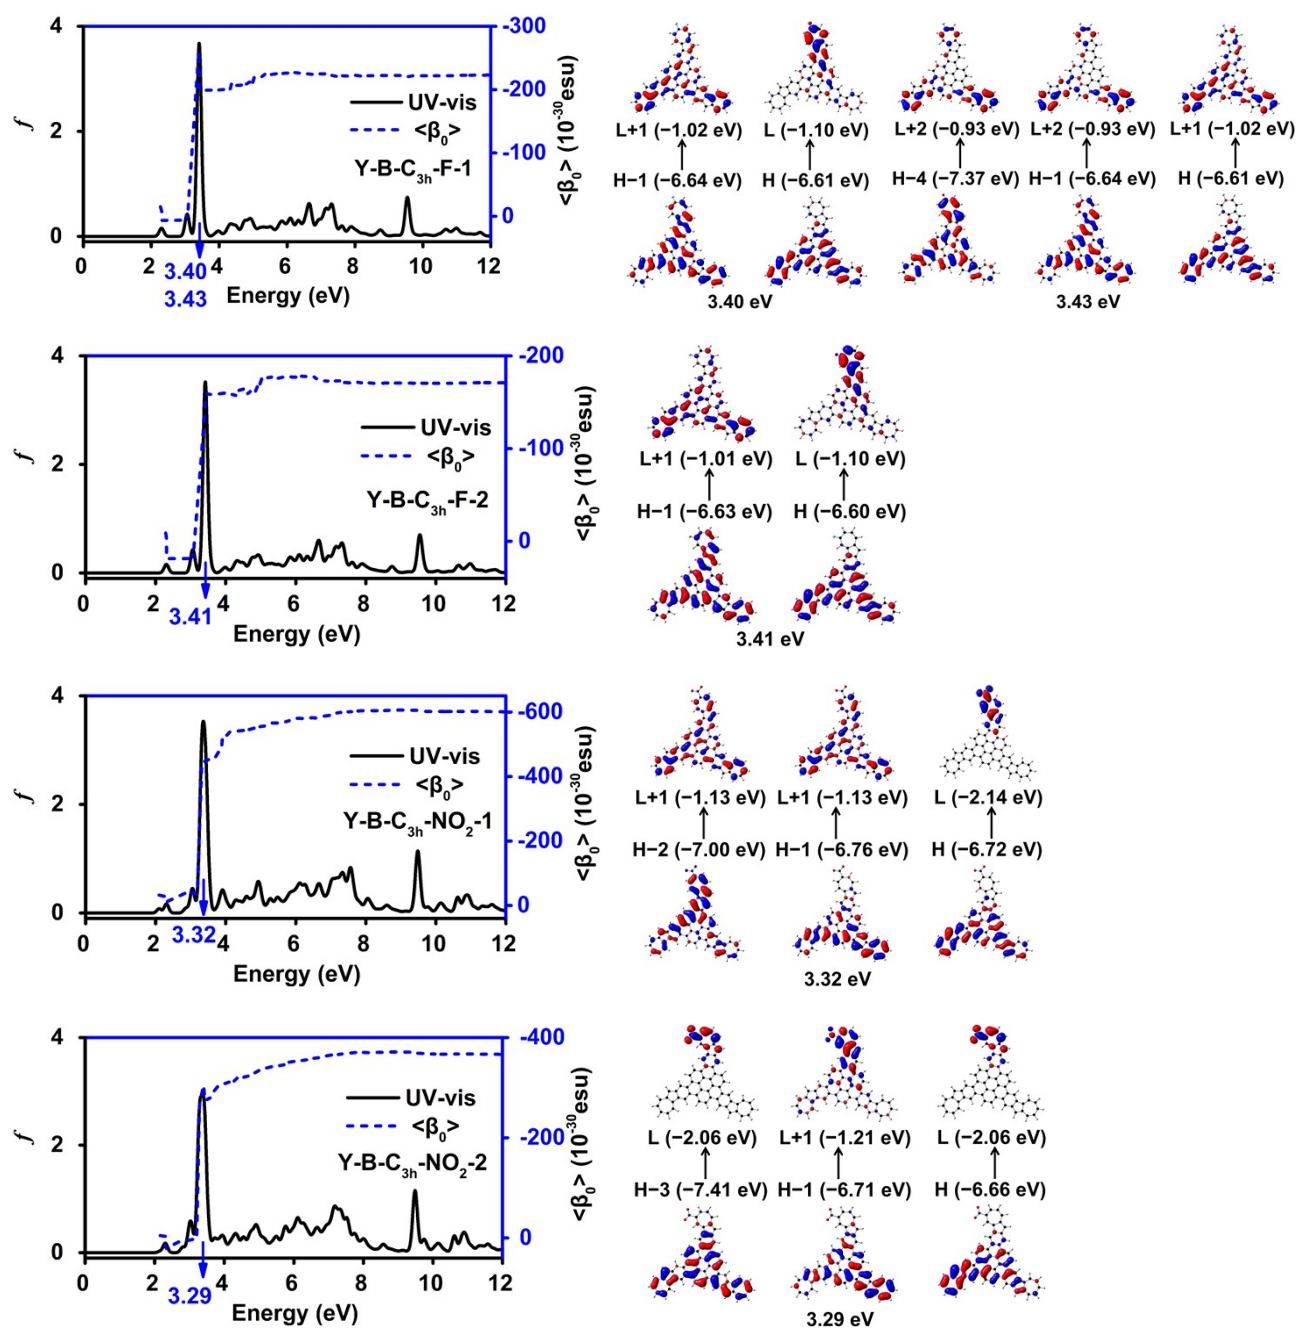

**Figure S2.** Evolution of the static first hyperpolarizability ( $\langle\beta_0\rangle$ ) with electron excitation in Y-B type molecules with F or NO<sub>2</sub> group at one azulene end in Y-B-C<sub>3h</sub>-3.

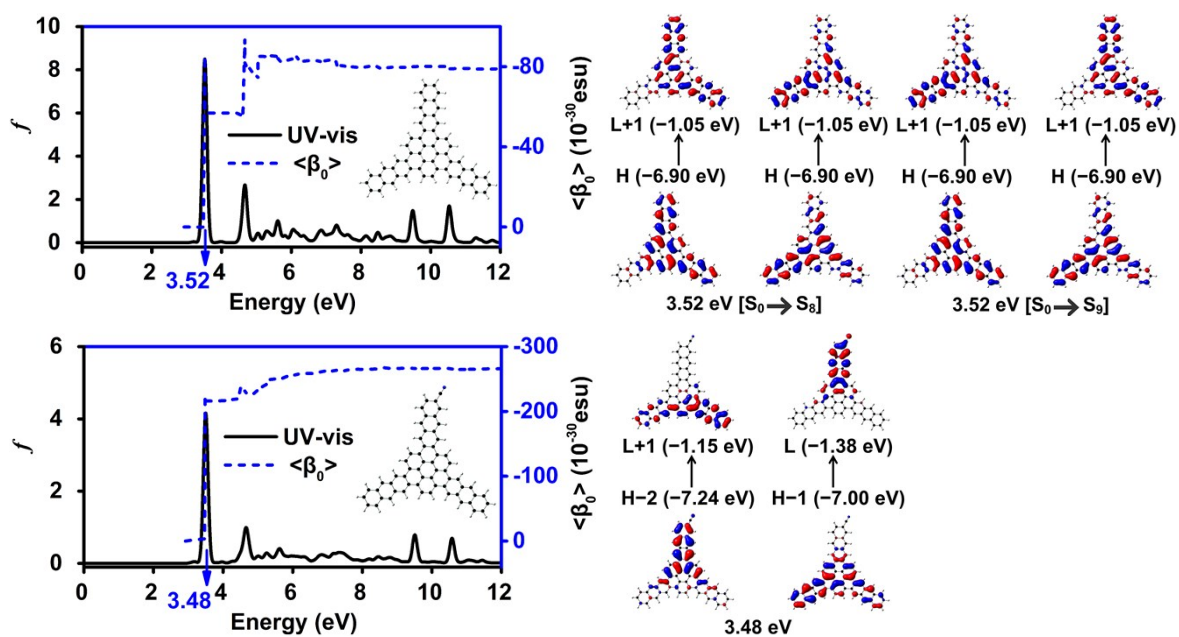

**Figure S3.** Evolution of the static first hyperpolarizability ( $\langle\beta_0\rangle$ ) with electron excitation in Y-B type molecules with naphthalene ends without ( $D_{3h}$ ) and with CN group ( $C_s$ ) at one naphthalene.

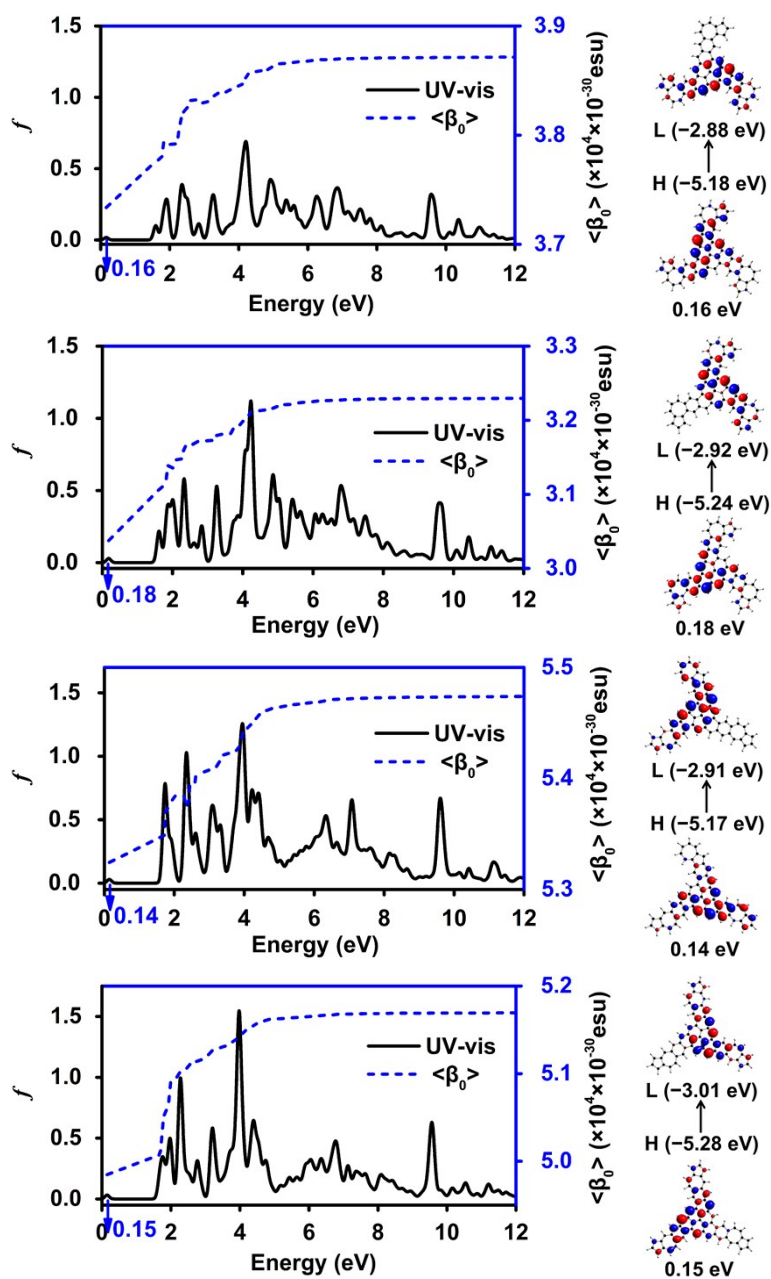

**Figure S4.** Evolution of the static first hyperpolarizability ( $\langle\beta_0\rangle$ ) with electron excitation in Y-Cs molecules.

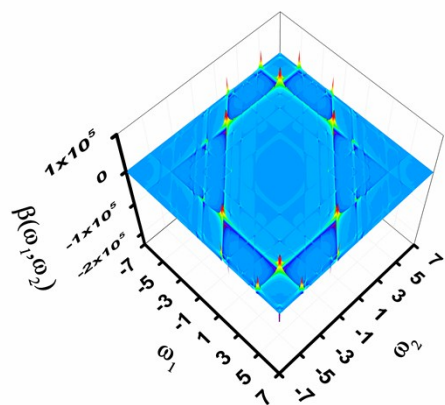

**Figure S5.** Two-dimensional second order NLO spectra of azulene scanned from  $-7.00$  eV to  $7.00$  eV with step size of  $0.05$  eV.

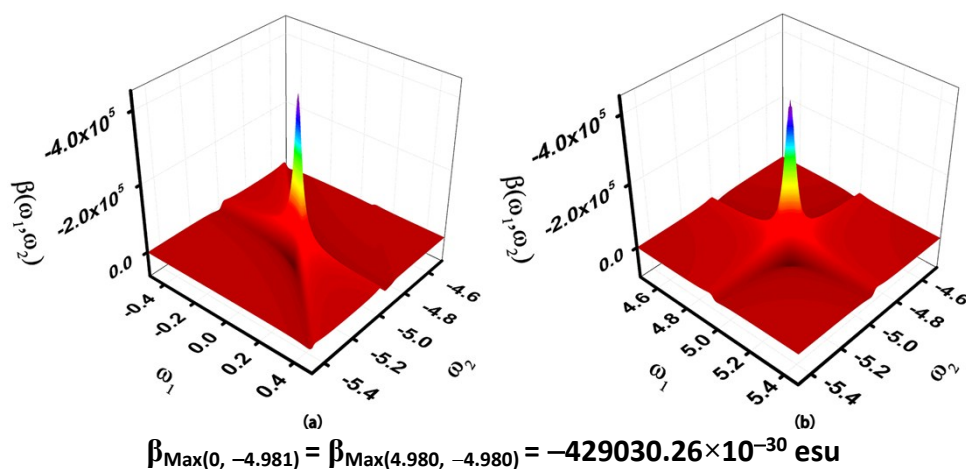

**Figure S6.** Two-dimensional second order NLO spectra of azulene with step size of  $0.005$  eV [(a)  $\omega_1$  scanned from  $-0.5$  eV to  $0.5$  eV and  $\omega_2$  scanned from  $-5.48$  eV to  $-4.48$  eV; (b)  $\omega_1$  scanned from  $4.48$  eV to  $5.48$  eV and  $\omega_2$  scanned from  $-5.48$  eV to  $-4.48$  eV].

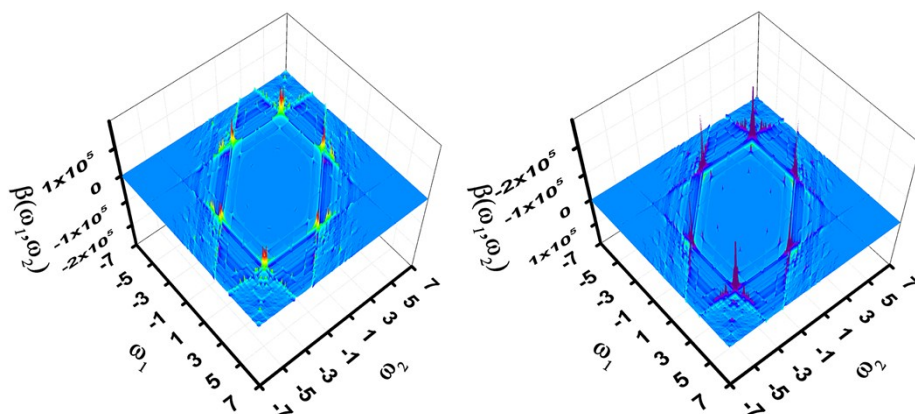

**Figure S7.** Two-dimensional second order NLO spectra of Y-B-NC-C<sub>2</sub>-3 scanned from  $-7.00$  eV to  $7.00$  eV with step size of  $0.05$  eV.

**Table S1.** Major electronic absorption peaks with transition nature in all molecules ( $f$  is the oscillator strength in arbitrary unit,  $E$  is the transition energy in eV, contribution to  $\langle\beta_0\rangle$  in  $10^{-30}$  esu).

| Compounds                                                         | $f$    | $E$  | Transition                      | Transition nature                                  | Contribution to $\langle\beta_0\rangle$ |
|-------------------------------------------------------------------|--------|------|---------------------------------|----------------------------------------------------|-----------------------------------------|
| PNA(C <sub>6</sub> H <sub>6</sub> N <sub>2</sub> O <sub>2</sub> ) | 0.4960 | 4.47 | S <sub>0</sub> →S <sub>4</sub>  | H→L (95.40%)                                       | -31.84                                  |
|                                                                   | 0.0234 | 2.21 | S <sub>0</sub> →S <sub>1</sub>  | H→L (91.51%)                                       | 1.94                                    |
|                                                                   | 0.4145 | 3.56 | S <sub>0</sub> →S <sub>2</sub>  | H-1→L (35.00%)<br>H→L+1 (64.60%)                   | 2.97                                    |
| Azulene(C <sub>10</sub> H <sub>8</sub> )                          | 0.2331 | 4.40 | S <sub>0</sub> →S <sub>3</sub>  | H-1→L (80.28%)                                     | 2.64                                    |
|                                                                   | 2.0474 | 4.98 | S <sub>0</sub> →S <sub>4</sub>  | H-1→L (63.28%)<br>H→L+1 (34.05%)                   | 52.86                                   |
|                                                                   | 0.2752 | 6.85 | S <sub>0</sub> →S <sub>11</sub> | H-2→L+1 (34.49%)<br>H-1→L+2 (61.42%)               | -0.85                                   |
| Y-B-NC-C <sub>3</sub> -1(C <sub>36</sub> H <sub>24</sub> )        | 1.2405 | 4.99 | S <sub>0</sub> →S <sub>25</sub> | H-2→L (16.56%)                                     | 9.54                                    |
|                                                                   |        |      |                                 | H-2→L (16.56%)<br>H-1→L+2 (28.04%)                 |                                         |
| Y-B-NC-C <sub>1</sub> -2(C <sub>36</sub> H <sub>24</sub> )        | 0.9562 | 4.80 | S <sub>0</sub> →S <sub>23</sub> | H→L+5 (51.36%)                                     | -22.87                                  |
| Y-B-NC-C <sub>2</sub> -3(C <sub>36</sub> H <sub>24</sub> )        | 3.0325 | 4.18 | S <sub>0</sub> →S <sub>9</sub>  | H-4→L+1 (13.15%)                                   | 74.72                                   |
|                                                                   |        |      |                                 | H-3→L (18.94%)<br>H-2→L+3 (36.02%)                 |                                         |
| Y-B-NC-C <sub>2</sub> -4(C <sub>36</sub> H <sub>24</sub> )        | 3.1090 | 4.18 | S <sub>0</sub> →S <sub>11</sub> | H-4→L+2 (16.90%)                                   | 44.57                                   |
|                                                                   |        |      |                                 | H→L (13.05%)<br>H-3→L+4 (10.39%)<br>H→L+5 (14.58%) |                                         |
| Y-B-NC-C <sub>2</sub> -5(C <sub>36</sub> H <sub>24</sub> )        | 2.5249 | 4.16 | S <sub>0</sub> →S <sub>11</sub> | H-3→L+3 (11.75%)<br>H-2→L+3 (25.34%)               | 39.01                                   |
|                                                                   | 2.5333 | 4.16 | S <sub>0</sub> →S <sub>12</sub> | H-2→L+3 (11.28%)<br>H-1→L+4 (16.84%)               | -9.89                                   |
|                                                                   | 0.2723 | 4.87 | S <sub>0</sub> →S <sub>21</sub> | H-3→L (68.61%)                                     | 5.68                                    |
|                                                                   | 0.2642 | 4.87 | S <sub>0</sub> →S <sub>22</sub> | H-3→L+1 (67.91%)<br>H-3→L+5 (10.04%)               | -17.38                                  |
| Y-B-C <sub>5</sub> -1(C <sub>60</sub> H <sub>30</sub> )           | 4.6117 | 3.42 | S <sub>0</sub> →S <sub>8</sub>  | H-3→L (15.93%)                                     | -58.78                                  |
|                                                                   |        |      |                                 | H-2→L (14.13%)<br>H-1→L+1 (18.12%)                 |                                         |
| Y-B-C <sub>3h</sub> -2(C <sub>60</sub> H <sub>30</sub> )          | 3.9794 | 3.44 | S <sub>0</sub> →S <sub>8</sub>  | no major transition                                | -50.41                                  |
|                                                                   |        |      |                                 | H-2→L+1 (14.28%)                                   | -95.41                                  |
|                                                                   |        |      |                                 | H→L (16.58%)<br>H→L (16.58%)                       |                                         |
| Y-B-C <sub>3h</sub> -3(C <sub>60</sub> H <sub>30</sub> )          | 3.5007 | 3.42 | S <sub>0</sub> →S <sub>8</sub>  | H-2→L+1 (14.28%)                                   | 28.17                                   |
|                                                                   |        |      |                                 | H→L (16.58%)<br>H→L (16.58%)                       |                                         |
|                                                                   |        |      |                                 | H→L+1 (11.22%)<br>H→L (14.93%)<br>H→L (14.93%)     |                                         |
| Y-B-C <sub>3h</sub> -2-CN (C <sub>61</sub> H <sub>29</sub> N)     | 4.4728 | 3.40 | S <sub>0</sub> →S <sub>8</sub>  | H→L+1 (11.22%)                                     | -125.79                                 |
|                                                                   |        |      |                                 | H→L (14.93%)<br>H→L (14.93%)                       |                                         |
| Y-B-C <sub>3h</sub> -2-CN (C <sub>61</sub> H <sub>29</sub> N)     | 4.4728 | 3.40 | S <sub>0</sub> →S <sub>8</sub>  | H-2→L+1 (23.68%)                                   | -98.97                                  |

|                                                                                                  |        |      |                                |                                                                      |         |
|--------------------------------------------------------------------------------------------------|--------|------|--------------------------------|----------------------------------------------------------------------|---------|
|                                                                                                  |        |      |                                | H-1→L+1 (12.74%)<br>H→L (12.59%)                                     |         |
|                                                                                                  | 3.9006 | 3.45 | S <sub>0</sub> →S <sub>9</sub> | H-4→L+2 (16.54%)<br>H-1→L+2 (14.83%)<br>H→L+1 (14.83%)               | 45.96   |
| Y-B-C <sub>3h</sub> -2-NC (C <sub>61</sub> H <sub>29</sub> N)                                    | 4.5311 | 3.41 | S <sub>0</sub> →S <sub>8</sub> | H-2→L+1 (18.23%)<br>H-1→L+1 (15.03%)<br>H→L (12.59%)                 | -33.77  |
|                                                                                                  | 3.9141 | 3.45 | S <sub>0</sub> →S <sub>9</sub> | H-4→L+2 (18.84%)<br>H-1→L+2 (13.20%)<br>H→L+1 (15.25%)               | 76.08   |
| Y-B-C <sub>3h</sub> -3-CN1(C <sub>61</sub> H <sub>29</sub> N)                                    | 0.1208 | 2.19 | S <sub>0</sub> →S <sub>1</sub> | H-4→L (19.92%)<br>H-2→L (54.21%)<br>H-1→L (13.01%)                   | -31.38  |
|                                                                                                  | 3.8662 | 3.35 | S <sub>0</sub> →S <sub>8</sub> | H-2→L (14.29%)<br>H-1→L (13.09%)<br>H→L (18.34%)                     | -341.73 |
|                                                                                                  | 3.2017 | 3.43 | S <sub>0</sub> →S <sub>9</sub> | H-4→L+2 (11.80%)<br>H-1→L+2 (22.38%)<br>H→L+1 (14.46%)               | 24.96   |
| Y-B-C <sub>3h</sub> -3-CN2(C <sub>61</sub> H <sub>29</sub> N)                                    | 0.2494 | 2.86 | S <sub>0</sub> →S <sub>4</sub> | H-2→L+1 (22.79%)<br>H-2→L+1 (15.74%)                                 | -32.97  |
|                                                                                                  | 0.1939 | 3.38 | S <sub>0</sub> →S <sub>8</sub> | H-3→L (10.29%)<br>H→L (28.07%)                                       | -451.66 |
| Y-B-C <sub>3h</sub> -3-CH <sub>3</sub> (C <sub>61</sub> H <sub>32</sub> )                        | 3.5159 | 3.42 | S <sub>0</sub> →S <sub>8</sub> | H→L+1 (14.18%)                                                       | -72.54  |
|                                                                                                  | 3.4927 | 3.43 | S <sub>0</sub> →S <sub>9</sub> | H-1→L+2 (14.99%)                                                     | 179.86  |
| Y-B-C <sub>3h</sub> -3-C(CH <sub>3</sub> ) <sub>3</sub> -1<br>(C <sub>64</sub> H <sub>38</sub> ) | 3.5591 | 3.42 | S <sub>0</sub> →S <sub>8</sub> | H→L (12.49%)<br>H→L+1 (19.20%)                                       | -76.83  |
|                                                                                                  | 3.5108 | 3.43 | S <sub>0</sub> →S <sub>9</sub> | H→L+2 (19.04%)<br>H→L (12.49%)                                       | 170.41  |
| Y-B-C <sub>3h</sub> -3-C(CH <sub>3</sub> ) <sub>3</sub> -2<br>(C <sub>64</sub> H <sub>38</sub> ) | 3.4659 | 3.41 | S <sub>0</sub> →S <sub>8</sub> | H-1→L (16.82%)<br>H→L (15.90%)                                       | 195.35  |
|                                                                                                  | 3.5228 | 3.42 | S <sub>0</sub> →S <sub>9</sub> | H-3→L+1 (10.38%)<br>H-1→L (15.50%)<br>H→L (10.36%)<br>H→L+1 (11.35%) | -82.45  |
| Y-B-C <sub>3h</sub> -3-F-1(C <sub>60</sub> H <sub>29</sub> F)                                    | 3.6772 | 3.40 | S <sub>0</sub> →S <sub>8</sub> | H-1→L+1 (15.04%)<br>H→L (21.10%)                                     | -262.56 |
|                                                                                                  | 3.4096 | 3.43 | S <sub>0</sub> →S <sub>9</sub> | H-4→L+2 (12.04%)<br>H-1→L+2 (19.62%)<br>H→L+1 (15.16%)               | 62.88   |
| Y-B-C <sub>3h</sub> -3-F-2(C <sub>60</sub> H <sub>29</sub> F)                                    | 3.5192 | 3.41 | S <sub>0</sub> →S <sub>8</sub> | H-1→L+1 (13.17%)<br>H→L (23.04%)                                     | -159.21 |
| Y-B-C <sub>3h</sub> -3-NO <sub>2</sub> -1<br>(C <sub>60</sub> H <sub>29</sub> NO <sub>2</sub> )  | 3.5323 | 3.32 | S <sub>0</sub> →S <sub>9</sub> | H-2→L+1 (21.42%)<br>H-1→L+1 (11.94%)<br>H→L (17.23%)                 | -407.36 |
| Y-B-C <sub>3h</sub> -3-NO <sub>2</sub> -2<br>(C <sub>60</sub> H <sub>29</sub> NO <sub>2</sub> )  | 2.9487 | 3.29 | S <sub>0</sub> →S <sub>9</sub> | H-3→L (10.73%)<br>H-1→L+1 (12.80%)                                   | -268.18 |



|                                                                                       |        |      |                                |                                    |          |
|---------------------------------------------------------------------------------------|--------|------|--------------------------------|------------------------------------|----------|
|                                                                                       |        |      |                                | H→L (23.75%)                       |          |
| Y-B-D <sub>3h</sub> (C <sub>60</sub> H <sub>30</sub> )                                | 4.2492 | 3.52 | S <sub>0</sub> →S <sub>8</sub> | H→L+1 (29.17%)<br>H→L+1 (29.17%)   | -85.34   |
|                                                                                       | 4.2492 | 3.52 | S <sub>0</sub> →S <sub>9</sub> | H→L+1 (29.17%)<br>H→L+1 (29.17%)   | 28.45    |
| Y-B-D <sub>3h</sub> -CN(C <sub>61</sub> H <sub>29</sub> N)                            | 4.1297 | 3.48 | S <sub>0</sub> →S <sub>8</sub> | H-2→L+1 (29.17%)<br>H-1→L (29.17%) | -220.72  |
| Y-C-C <sub>3h</sub> -1(C <sub>58</sub> H <sub>30</sub> )                              | 0.0478 | 0.16 | S <sub>0</sub> →S <sub>1</sub> | H→L (91.30%)                       | 37336.50 |
| Y-C-C <sub>5</sub> -2(C <sub>58</sub> H <sub>30</sub> )                               | 0.0511 | 0.18 | S <sub>0</sub> →S <sub>1</sub> | H→L (91.91%)                       | 30375.50 |
| Y-C-C <sub>5</sub> -3(C <sub>58</sub> H <sub>30</sub> )                               | 0.0397 | 0.14 | S <sub>0</sub> →S <sub>1</sub> | H→L (89.26%)                       | 53243.80 |
| Y-C-C <sub>3h</sub> -4(C <sub>58</sub> H <sub>30</sub> )                              | 0.0522 | 0.15 | S <sub>0</sub> →S <sub>1</sub> | H→L (91.04%)                       | 49846.40 |
| Y-C-C <sub>5</sub> -5(C <sub>58</sub> H <sub>30</sub> )                               | 0.1023 | 0.29 | S <sub>0</sub> →S <sub>1</sub> | H→L (91.85%)                       | 14705.50 |
| Y-C-C <sub>3h</sub> -6(C <sub>58</sub> H <sub>30</sub> )                              | 0.0628 | 0.17 | S <sub>0</sub> →S <sub>1</sub> | H→L (90.86%)                       | 42145.20 |
| Y-Ref (C <sub>50</sub> H <sub>21</sub> N <sub>7</sub> O <sub>2</sub> S <sub>2</sub> ) | 3.0853 | 2.58 | S <sub>0</sub> →S <sub>1</sub> | H-1→L+1 (35.28%)<br>H→L (39.36%)   | -115.47  |
|                                                                                       | 0.9635 | 2.70 | S <sub>0</sub> →S <sub>2</sub> | H-1→L (40.16%)<br>H→L+1 (35.41%)   | -96.27   |
